# Supplementary material for: Preoperative Prediction for Early Recurrence Can Be as Accurate as Postoperative Assessment in Single Hepatocellular Carcinoma Patients
Source: PubMed Central journal article supplement — Korean J Radiol. 2020 Mar 4;21(4):402–12. doi: 10.3348/kjr.2019.0538 (PMC7082657; doi:10.3348/kjr.2019.0538), 2020-03-04
Supplement: kjr-21-402-s002.pdf [file kjr-21-402-s002.pdf]

**Supplementary Table 1. Inter-Observer Agreement of Reviewers for Imaging Findings**

| Imaging Finding           | R1  | R2  | $\kappa$ value | 95% CI      |
|---------------------------|-----|-----|----------------|-------------|
| Capsule                   | 374 | 268 | 0.581          | 0.518–0.644 |
| Typical HCC enhancement   | 472 | 477 | 0.806          | 0.732–0.880 |
| Irregular tumor contour   | 272 | 236 | 0.672          | 0.610–0.733 |
| Peritumoral enhancement   | 63  | 69  | 0.707          | 0.614–0.800 |
| Rim                       | 75  | 76  | 0.775          | 0.696–0.854 |
| Peritumoral hypointensity | 87  | 83  | 0.694          | 0.609–0.779 |

$\kappa$  value of 0.01–0.20 was interpreted as slight, 0.21–0.40 as fair, 0.41–0.60 as moderate, 0.61–0.80 as substantial, and 0.81–1.00 as excellent agreement. CI = confidence interval, HCC = hepatocellular carcinoma, Rim = arterial rim enhancement
